# Supplementary material
Source: Research Square preprint supplement (doi:10.21203/rs.3.rs-9540579/v1)
Supplement: Supplementary file 1 [file 79c7cc9ba709a3414f99609a.docx]

*Supplementary Material*

*Assessing Drivers of Forest Loss as Indicators of Habitat Degradation in the Greater Kafue Ecosystem of Zambia Using a Random Forest Approach*

Mulenga G., Phiri D., Simwanda M., Nyirenda V. R.

**Supplementary Table S1.** Model performance and validation summary for the Random Forest classifier of habitat‑loss drivers in the Greater Kafue Ecosystem.

| **Validation Aspect** | **Value** | **Interpretation** |
| --- | --- | --- |
| ***A. Test set performance (independent spatial holdout, n = 1,798)*** | | |
| Accuracy | 0.77 | *Good – overall classification skill* |
| AUC‑ROC | 0.83 | *Excellent – strong class separability* |
| F1‑score | 0.81 | *Good – balanced precision/recall on the loss class* |
| Cohen’s Kappa | 0.53 | *Moderate – substantial agreement beyond chance* |
| ***B. Spatial cross‑validation (10‑fold GroupKFold on 5×5 spatial blocks)*** | | |
| CV Accuracy (mean ± SD) | 0.84 ± 0.07 | *Stable across spatial folds (CV ≈ 8.1%)* |
| CV AUC‑ROC (mean ± SD) | 0.84 ± 0.07 | *Stable across spatial folds (CV ≈ 8.2%)* |
| Out‑of‑Bag (OOB) score | 0.85 | *Good internal generalisation* |
| ***C. Model configuration and sample design*** | | |
| Number of trees (n_estimators) | 500 | *Sufficient for stable importance estimates* |
| Predictors (after VIF screening) | 14 | *years_protected dropped (collinear with protection_status)* |
| Total samples (after 500 m thinning) | ≈ 8,990 | *Balanced loss vs. persistence; minimum n from Eq. 1 ≈ 576* |
| Training samples | ≈ 7,192 | *80% of samples; stratified by habitat loss class* |
| Test samples | 1,798 | *20% spatial block holdout (no shared blocks with training)* |
| Spatial CV folds | 10 | *GroupKFold over 5×5 spatial blocks (block ID = group)* |
| Random seed | 42 | *Fixed for full reproducibility* |
| Class weighting | balanced | *Compensates residual class imbalance during training* |
